# Supplementary material for: An indicator cell assay for blood-based diagnostics
Source: PLoS One. 2017 Jun 8;12(6):e0178608. doi: 10.1371/journal.pone.0178608 (PMC5464608; doi:10.1371/journal.pone.0178608)
Supplement: S2 Table — (XLSX) [file pone.0178608.s003.xlsx]

## Sheet: Sheet1
Supplemental Table S2, Danziger et al., 2016
134 genes used for murine ALS iCAP-based Disease Classifier 2: Gene Expression Classifier
Column A lists gene names
Column B lists log2 of differential expression in iCAP (average signal intensity with ALS mouse model/average signal intensity with non-carrier control samples)
Column C lists number of studies (out of 4) where a gene was significantly differentially regulated (as defined by the authors) in microdissected neurons of SOD1mutant mice at a presymptomatic stage (versus control mice)(Lobsiger et al., 2007; Perrin et al. 2005; Ferraiuolo et al., 2007). Up or down regulation is noted in brackets (Sod1 mutant versus control). 10 of 348 genes are in the 134-gene …
Column D lists genes that are in the list of "all als-related genes in ALSod" (on jan6, 2015)(Abel et al., 2012). Significance of overlap was estimated using R function: phyper(3,118,19502,134,lower.tail=FALSE,log.p=FALSE)
Column E shows genes that are targeted by ATF4 or CHOP (by Chip-seq) during ER stress (Han et al., 2013; Supplementary Table S2) (genes tarteted by ATF4, CHOP or both are labelled ATF4_Only, CHOP_Only, or Common, respectively). Significance of overlap was estimated using R function: phyper(38,575,19045,134,lower.tail=FALSE,log.p=FALSE)
Column F shows genes that are transcriptionally responsive to ER stress (Han et al., 2013; Supplementary Table S4). Genes up- and down-regulated by ER stress are labelled up and down, respectively.
Column H lists aliases of each gene used for PubMed searches for co-occurrence
Column I lists number of co-occurrances in PubMed abstracts or titles of gene name with "amyotrophic lateral sclerosis"
Column J lists number of co-occurrances in PubMed abstracts or titles of gene name with "Huntington's disease"
A	B	C	D	E	F	G	H	I
Gene	log2 iCAP differential expression	Responsive in vivo	ALS-related	Targeted by ATF4 or CHOP	ER stress	aliases used for PubMed abstract search	abstracts co-occurring with amyotrophic lateral sclerosis	abstracts co-occurring with Huntington's disease
AARS	-0.13306			Common	up	Aars or Cmt2n	0	0
ABCA1	-0.147189	2 (up)				TGD or ABC1 or CERP or ABC-1or HDLDT1 or ABCA1	0	2
ACSL1	-0.0465397				down	ACS1 or LACS or FACL1 or FACL2 or LACS1 or LACS2 or ACSL1	0	0
ADAR	-0.0945935					DSH or AGS6 or G1P1 or IFI4 or P136 or ADAR1 or DRADA or DSRAD or IFI-4 or K88DSRBP or ADAR	5	0
AIMP1	-0.0996182					p43 or HLD3 or EMAP2 or SCYE1 or EMAPII or AIMP1	0	0
ALDH18A1	-0.233148			Common	up	GSAS or P5CS or PYCS or ARCL3A or ALDH18A1	0	0
ARHGEF2	-0.0815882			Common	up	GEFH1 or GEF-H1 or ARHGEF2	0	1
ASNS	-0.250557			ATF4_Only	up	TS11 or ASNSD or ASNS	0	0
ATF3	-0.439321	2 (up)		Common	up	ATF3	9	0
ATF4	-0.234857	2 (up)				CREB2 or TXREB or CREB-2 or TAXREB67 or ATF4	3	2
ATXN2L	-0.110159			ATF4_Only	up	A2D or A2LG or A2LP or A2RP or ATXN2L	0	0
BCAR1	-0.0927882			ATF4_Only		CAS or CAS1 or CASS1 or CRKAS or P130Cas or BCAR1	0	0
BCDIN3D	0.0401838					BCDIN3D	0	0
BCKDHA	-0.0170966					MSU or MSUD1 or OVD1A or BCKDE1A or BCKDHA	0	0
BCKDK	-0.069684					BDK or BCKDKD or BCKDK	0	1
BIRC3	0.0908537					AIP1 or API2 or MIHC or CIAP2 or HAIP1 or HIAP1 or MALT2 or RNF49 or c-IAP2 or BIRC3	0	0
BRCA2	-0.0292468					FAD or FACD or FAD1 or GLM3 or BRCC2 or FANCD or PNCA2 or FANCD1 or XRCC11 or BROVCA2 or BRCA2	0	2
BRF2	-0.145362					BRFU or TFIIIB50 or BRF2	0	0
CAPZB	-0.069169				down	CAPB or CAPZ or CAPPB or CAPZB	0	0
CARS	-0.234605			ATF4_Only	up	CARS1 or CYSRS or MGC:11246 or CARS	0	0
CDC5L	0.00971618					CDC5 or CEF1 or PCDC5RP or CDC5-LIKE or dJ319D22.1 or CDC5L	0	0
CSDA	-0.0275416					CSDA or DBPA or CSDA1 or ZONAB or YBX3	0	0
DARS	0.0052363					HBSL or aspRS or DARS	0	0
DARS2	0.0206577					LBSL or ASPRS or MT-ASPRS or DARS2	0	0
DDIT3	-0.293502	1 (up)		Common	up	(CEBP[Title/Abstract] OR CEBPZ[Title/Abstract] OR CHOP[Title/Abstract] OR CHOP-10[Title/Abstract] OR CHOP10[Title/Abstract] OR GADD153[Title/Abstract] OR ddit3[Title/Abstract])	10	4
DDR2	-0.151566	1 (up)		Common	up	TKT or MIG20a or NTRKR3 or TYRO10 or DDR2	0	0
DIS3L	-0.0483497					DIS3L1 or DIS3L	0	0
DNASE1L2	-0.0943013					DNAS1L2 or DNASE1L2	0	0
DPH3	-0.0642968					DESR1 or DPH3A or KTI11 or ZCSL2 or DELGIP or DELGIP1 or DPH3	0	0
DUSP26	-0.0315542					MKP8 or LDP-4 or NATA1 or SKRP3 or DUSP24 or DUSP26	0	0
EEF1B2	-0.119339	1 (up)				EF1B or EEF1B or EEF1B1 or EEF1B2	0	0
EGLN1	-0.10215					HPH2 or PHD2 or SM20 or ECYT3 or HALAH or HPH-2 or HIFPH2 or ZMYND6 or C1orf12 or HIF-PH2 or EGLN1	0	0
ELAVL1	0.00442319					HUR or Hua or MelG or ELAV1 or ELAVL1	7	0
ENSA	-0.0819038					ARPP-19e or ENSA	0	0
EPRS	-0.132015			Common	up	EARS or PARS or QARS or QPRS or PIG32 or GLUPRORS or EPRS	0	0
FARSB	-0.047628				up	FRSB or PheHB or PheRS or FARSLB or HSPC173 or FARSB	0	0
GADD45G	-0.12252				down	CR6 or DDIT2 or GRP17 or GADD45gamma or GADD45G	0	0
GARS	-0.205174		GARS	Common	up	HMN5 or CMT2D or DSMAV or GlyRS or SMAD1 or GARS	8	1
GLA	-0.0533586				down	GALA or GLA or galactosidase	1	0
GLS	0.0728292					GAC or GAM or KGA or GLS1 or AAD20 or GLS or glutaminase	4	2
GNB2L1	-0.0402077					H12.3 or HLC-7 or PIG21 or RACK1 or Gnb2-rs1 or GNB2L1	0	1
GOT1	-0.059305			ATF4_Only	up	cCAT or GIG18 or cAspAT or ASTQTL1 or GOT1	0	0
GPT2	-0.221918			Common	up	ALT2 or GPT2	0	0
GTPBP1	-0.0292672					GP1 or GP-1 or HSPC018 or GTPBP1	0	0
HADH	-0.0723451	1 (up)				HAD or HCDH or HHF4 or HADH1 or SCHAD or HADHSC or MSCHAD or HADH	0	0
HDGF	-0.0272163					HMG1L2 or HDGF	0	0
HERPUD1	-0.271379			ATF4_Only	up	SUP or HERP or Mif1 or HERPUD1	1	0
HEXA	-0.0757421		HEXA			TSD or HEXA	2	0
HEXB	-0.0956618	3 (up)				ENC-1AS or HEL-248 or HEXB	0	0
HEXDC	-0.00988685					HEXDC	0	0
HHIP	-0.245256					HHIP	0	0
HRG	0.0175158					GGF or HGL or HRG or NDF or ARIA or GGF2 or HRG1 or HRGA or SMDF or MST131 or MSTP131 or NRG1-IT2 or HRG or neuregulin	5	1
HSPA5	0.0817285			Common	up	BIP or MIF2 or GRP78 or HEL-S-89n or HSPA5	10	11
IARS	-0.127037			Common	up	IRS or ILRS or IARS1 or ILERS or PRO0785 or IARS	0	0
INPP5A	-0.087305					5PTASE or INPP5A	0	0
INPP5B	-0.0888921			ATF4_Only	up	5PTase or INPP5B	0	0
INPP5K	0.0242662					INPP5K	0	0
INSR	-0.0492703			CHOP_Only		HHF5 or CD220 or INSR	0	0
KCNV1	0.0952719					HNKA or KCNB3 or KV2.3 or KV8.1 or KCNV1	0	0
KDM1A	-0.0419783					AOF2 or KDM1 or LSD1 or BHC110 or KDM1A	0	0
KDM4A	-0.0614396					JMJD2 or JHDM3A or JMJD2A or TDRD14A or KDM4A	0	0
LARS	-0.182222			Common	up	LRS or LEUS or LFIS or ILFS1 or LARS1 or LEURS or PIG44 or RNTLS or HSPC192 or hr025Cl or LARS	0	0
LIPT1	-0.159513					LIPT1	0	0
MARS	-0.157288			Common		METRS or MTRNS or SPG70 or MARS	0	0
MEF2C	0.0526678					DEL5q14.3 or C5DELq14.3 or MEF2C	1	0
MEPCE	-0.0447443					BCDIN3 or MEPCE	0	0
MTHFD1L	-0.152959			ATF4_Only		FTHFSDC1 or MTC1THFS or dJ292B18.2 or MTHFD1L	0	0
MTHFD2	-0.436716			Common	up	NMDMC or MTHFD2	0	0
MTHFR	-0.110851			ATF4_Only		MTHFR	4	3
MYC	-0.0250871				up	MRTL or MYCC or c-Myc or bHLHe39 or MYC	0	5
NARS	-0.142519			Common	up	ASNRS or NARS1 or NARS	0	0
NDUFAB1	-0.0550799					ACP or SDAP or FASN2A or NDUFAB1	0	0
NMT2	-0.043647					NMT2	0	0
NOP14	-0.0597023				up	UTP2 or NOL14 or C4orf9 or RES425 or RES4-25 or NOP14	0	1
NPM1	0.00868214					B23 or NPM or NPM1	0	0
NR2F1	-0.017628					ARP1 or CHTD4 or NF-E3 or NR2F1 or SVP40 or COUPTFB or TFCOUP2 or COUPTFII or NR2F1	0	0
NUDT16	0.0210575					NUDT16	0	0
PAM16	-0.00172563					TIM16 or MAGMAS or TIMM16 or CGI-136 or PAM16	0	0
PDGFA	0.0253285					PDGF1 or PDGF-A or PDGFA	0	1
PGD	0.0707751					6PGD or PGD	0	0
PHF8	-0.0532211					JHDM1F or MRXSSD or ZNF422 or PHF8	0	0
PIPOX	-0.0927888					LPIPOX or PIPOX	0	0
PPA1	0.0288071					IOPPP or HEL-S-66p or SID6-8061 or PPA1	0	0
PPT1	0.102074					PPT or CLN1 or INCL or PPT1	0	1
PPT2	-0.0409479					G14 or PPT-2 or C6orf8 or PPT2	0	0
PRMT1	-0.0770087					ANM1 or HCP1 or IR1B4 or HRMT1L2 or PRMT1	4	0
PRMT6	-0.113382					HRMT1L6 or PRMT6	0	0
PRPF19	-0.0748523					PSO4 or SNEV or PRP19 or UBOX4 or hPSO4 or NMP200 or PRPF19	0	0
PSAT1	-0.200338	1 (up)		ATF4_Only	up	EPIP or NLS2 or PSAT or PSATD or PSAT1	0	0
PSMD4	-0.107165					AF or ASF or S5A or AF-1 or MCB1 or Rpn10 or pUB-R5 or PSMD4	2	1
PSTK	0.00130005					C10orf89 or PSTK	0	0
PTCH1	-0.0929897					PTC or BCNS or HPE7 or PTC1 or PTCH or NBCCS or PTCH11 or PTCH1	0	0
PUM2	-0.0460557					PUMH2 or PUML2 or PUM2	0	0
PYCR1	-0.21361			ATF4_Only	up	P5C or P5CR or PRO3 or PYCR or PIG45 or PP222 or ARCL2B or ARCL3B or PYCR1	0	0
RAD23B	-0.0975553					P58 or HR23B or HHR23B or RAD23B	0	0
RAD52	-0.0485183					RAD52	0	0
RPA3	-0.0498481			CHOP_Only		REPA3 or RPA3	0	0
RPS7	-0.117324					S7 or DBA8 or RPS7	0	0
RS1	-0.0781297					XLRS1 or RS1 or retinoschisin	0	0
RXRB	-0.0662451					NR2B2 or DAUDI6 or RCoR-1 or H-2RIIBP or RXRB	0	0
SARS	-0.119013			Common	up	SERS or SERRS or SARS	0	0
SARS2	0.00810517					SYS or SARS or SERS or SARSM or SerRS or SerRSmt or mtSerRS or SARS2	0	0
SEC61G	-0.0847746					SSS1 or SEC61G	0	0
SEPSECS	-0.0381145					SEPSECS	0	0
SEZ6L	-0.0566747					SEZ6L	0	0
SHMT2	-0.233414			ATF4_Only	up	GLYA or SHMT or HEL-S-51e or SHMT2	0	0
SLC1A4	-0.301035			ATF4_Only	up	SATT or ASCT1 or SLC1A4	2	0
SLC1A5	-0.116324			ATF4_Only	up	R16 or AAAT or ATBO or M7V1 or RDRC or ASCT2 or M7VS1 or SLC1A5	3	0
SLC7A1	-0.398712			ATF4_Only	up	ERR or ATRC1 or CAT-1 or HCAT1 or REC1L or SLC7A1	0	0
SLC7A5	-0.351631			Common	up	E16 or CD98 or LAT1 or 4F2LC or MPE16 or hLAT1 or D16S469E or SLC7A5	0	1
SPRY1	-0.0636042				up	hSPRY1 or SPRY1	0	0
STRA13	0.0293914					D9 or MHF2 or CENPX or CENP-X or FAAP10 or STRA13	0	0
SUPT7L	0.0971879					SPT7L or STAF65 or SUPT7H or STAF65G or STAF65gamma or SUPT7L	0	0
T2	0.0404829					T2****	0	0
TADA1	-0.0343979					ADA1 or HFI1 or hADA1 or STAF42 or TADA1L or TADA1	0	0
TAF12	-0.0354022					TAF2J or TAFII20 or TAF12	0	0
TAF5L	-0.143					PAF65B or TAF5L	0	0
TARS	-0.194967			ATF4_Only	up	ThrRS or TARS	0	0
TIMM17A	-0.0364148					TIM17 or TIM17A or TIMM17A	0	0
TIMM17B	-0.0126092					JM3 or TIM17B or DXS9822 or TIMM17B	0	0
TOMM20	-0.0616662	1 (up)				MAS20 or MOM19 or TOM20 or TOMM20	0	2
TSC22D3	-0.108137			ATF4_Only	up	(DIP or GILZ or hDIP or DSIPI or TSC-22R or tsc22d3)	0	0
TXNIP	-0.177854				up	THIF or VDUP1 or HHCPA78 or EST01027 or TXNIP	0	0
UBE2A	-0.0705439					UBC2 or HHR6A or MRXSN or RAD6A or MRXS30 or UBE2A	0	1
UBR2	-0.0916909			Common		C6orf133 or bA49A4.1 or dJ242G1.1 or dJ392M17.3 or ubr2	1	0
UBR5	-0.0461163					DD5 or EDD or HYD or EDD1 or UBR5	0	0
VARS2	0.0166003					VALRS or VARSL or VARS2L or COXPD20 or VARS2	0	0
VDAC2	-0.0489733					POR or VDAC2	1	0
VDAC3	-0.0698525				up	VDAC-3 or HD-VDAC3 or VDAC3	0	0
VEGFA	-0.152483		VEGFA			VPF or VEGF or MVCD1 or VEGFA	119	9
VPS4B	0.0493889					MIG1 or SKD1 or SKD1B or VPS4-2 or VPS4B	0	0
YARS	-0.191007			Common	up	(YARS or CMTDIC or TYRRS or YRS or YTS)	0	0
YARS2	-0.0375661					TYRRS or CGI-04 or MLASA2 or MT-TYRRS or YARS2	0	0
ZFP36L2	-0.0530388					BRF2 or ERF2 or ERF-2 or TIS11D or RNF162C or ZFP36L2	0	0
